# Supplementary material for: Early blood immune molecular alterations in cynomolgus monkeys with a PSEN1 mutation causing familial Alzheimer's disease
Source: PubMed Central journal article supplement — Alzheimers Dement. 2024 Jul 7;20(8):5492–510. doi: 10.1002/alz.14046 (PMC11350033; doi:10.1002/alz.14046), 2024-07-07
Supplement: ALZ-20-5492-s001.pdf [file ALZ-20-5492-s001.pdf]

## Supplemental Information

### Early blood immune molecular alterations in cynomolgus monkeys with a *PSEN1* mutation causing familial Alzheimer's disease

Mengqi Li, Mingfeng Guan, Jianbang Lin, Kaichuan Zhu, Jiayi Zhu, Ming Guo, Yinhu Li, Yefei Chen, Yijing Chen, Ying Zou, Daiqiang Wu, Junxin Xu, Wanying Yi, Yingying Fan, Shuangshuang Ma, Yuewen Chen, Jun Xu, Lixin Yang, Ji Dai, Tao Ye, Zhonghua Lu, and Yu Chen

#### Summary of the supplementary figures

|           |                                                                                                                        |
|-----------|------------------------------------------------------------------------------------------------------------------------|
| Figure S1 | Generation of cynomolgus monkeys with <i>PSEN1</i> - $\Delta$ E9 mutation                                              |
| Figure S2 | Off-target analysis of <i>PSEN1</i> - $\Delta$ E9 cynomolgus monkeys                                                   |
| Figure S3 | Precise exon 9 deletion in <i>PSEN1</i> - $\Delta$ E9 cynomolgus monkey-derived fibroblasts                            |
| Figure S4 | Enriched KEGG pathways from blood transcriptome sequencing of <i>PSEN1</i> - $\Delta$ E9 cynomolgus monkeys            |
| Figure S5 | Altered plasma proteins in <i>PSEN1</i> - $\Delta$ E9 cynomolgus monkeys                                               |
| Figure S6 | Characteristics of AD-associated pathological proteins in the plasma of <i>PSEN1</i> - $\Delta$ E9 cynomolgus monkeys. |

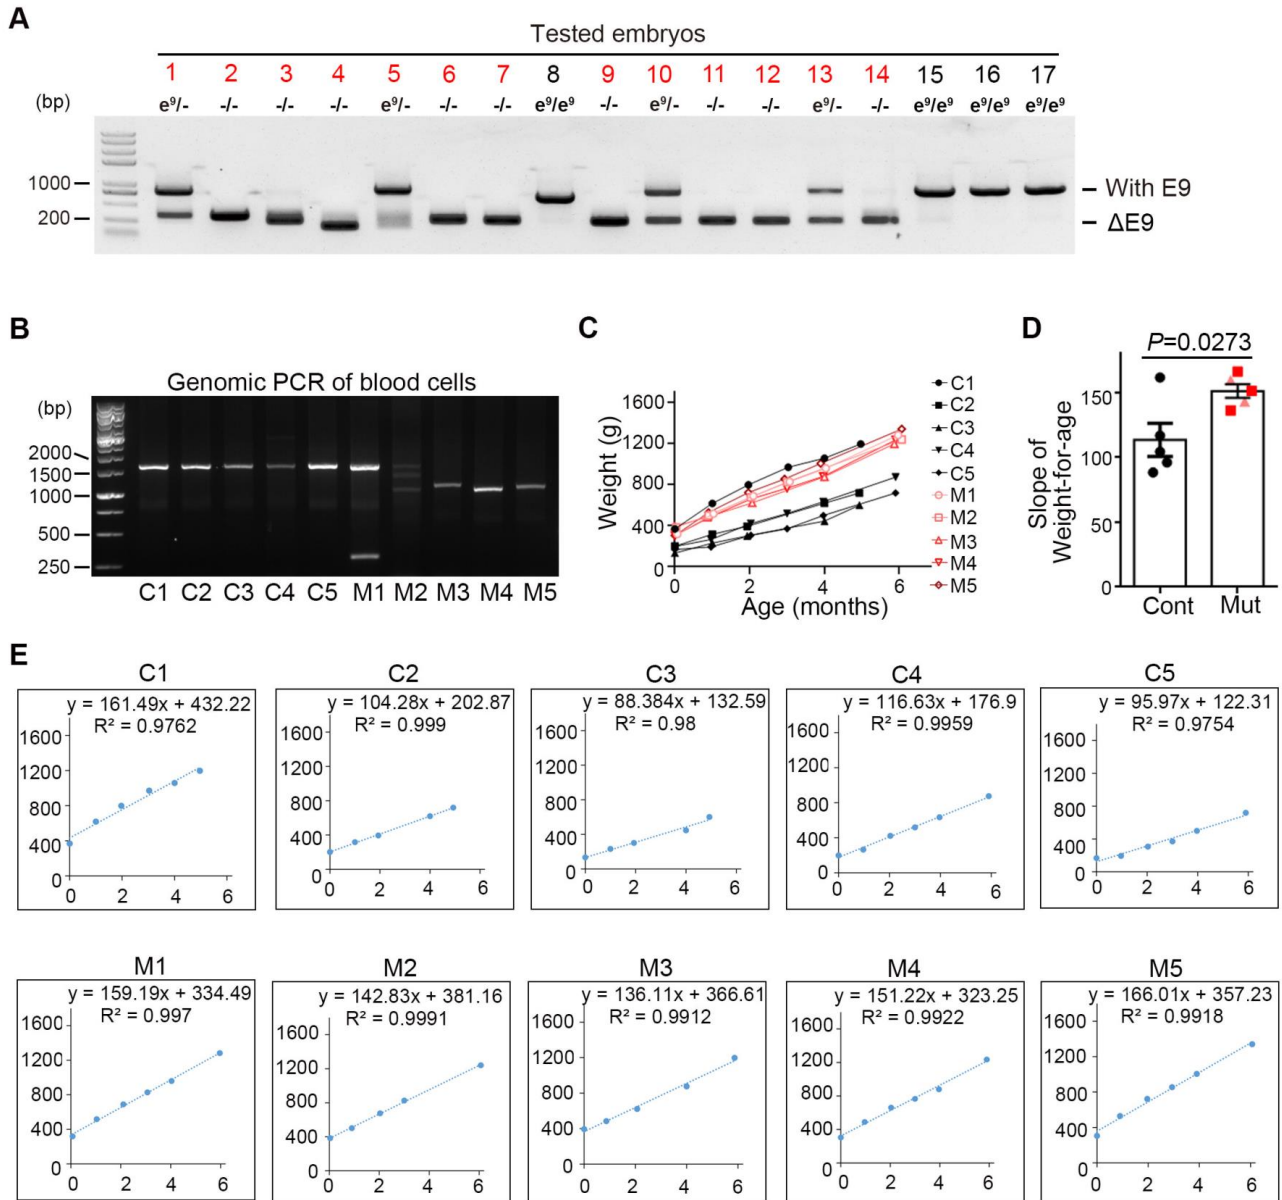

**Supplementary Figure S1. Generation of cynomolgus monkeys with *PSEN1*- $\Delta$ E9 mutation.** (A) PCR of the target region of *PSEN1* in injected embryos. PCR products that appear at ~ 800 bp indicate amplicons with E9, while the ~ 250 bp PCR products indicate the  $\Delta$ E9 amplicons.  $\Delta$ E9 embryo numbers are labelled in red with homozygous *PSEN1*- $\Delta$ E9 marked as -/- and the heterozygous as e<sup>9</sup>/- below the numbers. (B) Genomic PCR of *PSEN1* exon 9 from cynomolgus monkey blood cells. (C) Weight-for-age chart of *PSEN1*- $\Delta$ E9 mutant and control cynomolgus monkeys. (D) Slope analysis of weight-for-age chart of *PSEN1*- $\Delta$ E9 mutant and control cynomolgus monkeys in (C). (E) Display of the individual weight-for-age chart and calculated slope of *PSEN1*- $\Delta$ E9 mutant and control and cynomolgus monkeys in (C) and (D).

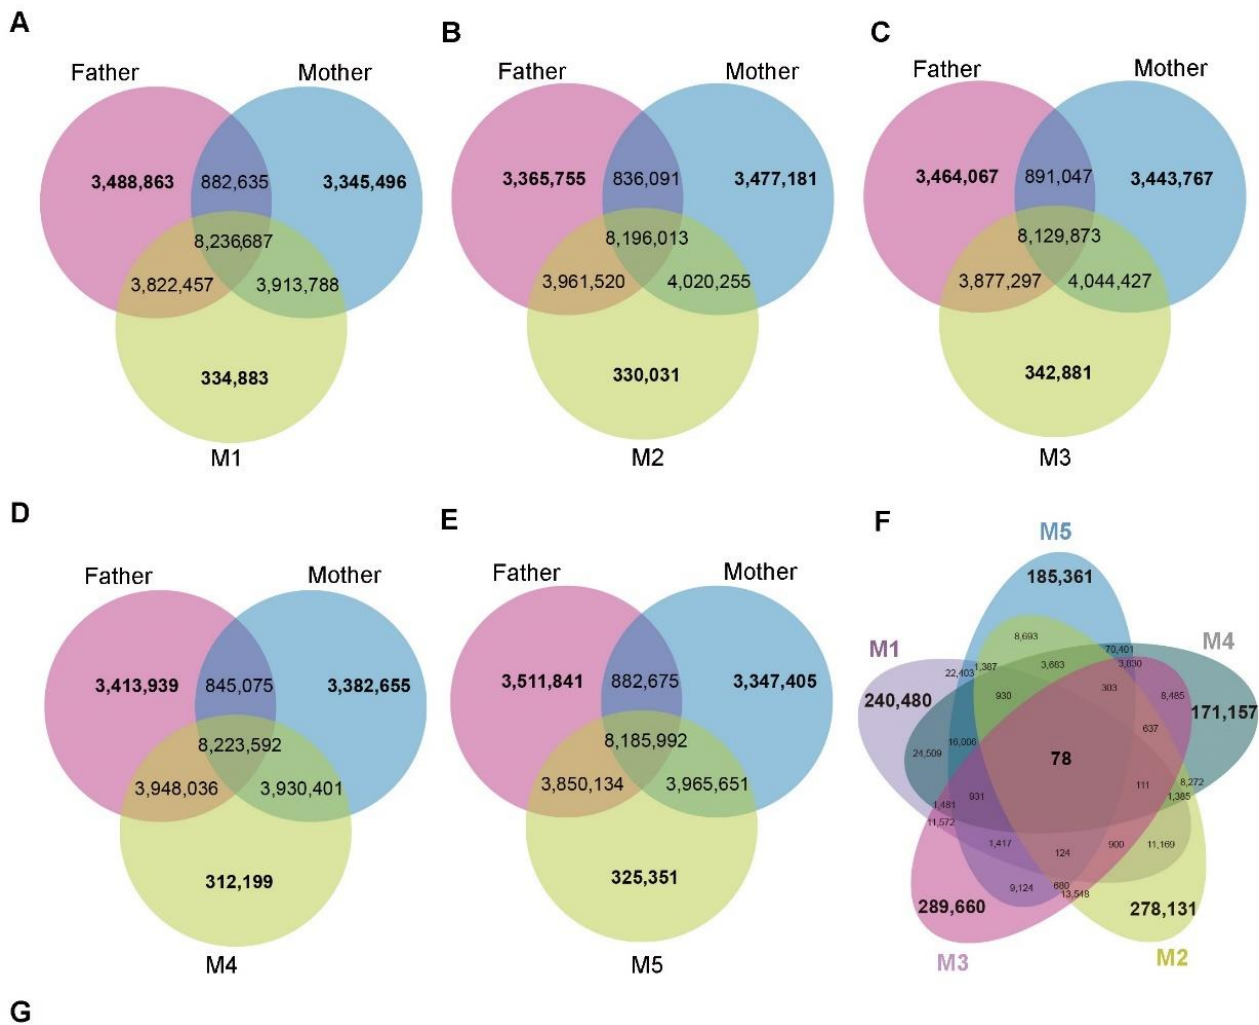

**Supplementary Figure S2. Off-target analysis of *PSENI-ΔE9* cynomolgus monkeys.** (A–E) Venn diagram of the *de novo* variants identified by whole-genome sequencing in *PSENI-ΔE9* monkeys compared to the reference genome *Macaca\_fascicularis\_5.0*. (F) Analysis of the overlapped *de novo* variants in *PSENI-ΔE9* cynomolgus monkeys. (G) Statistics of the *de novo* variants revealed by whole genome sequencing.

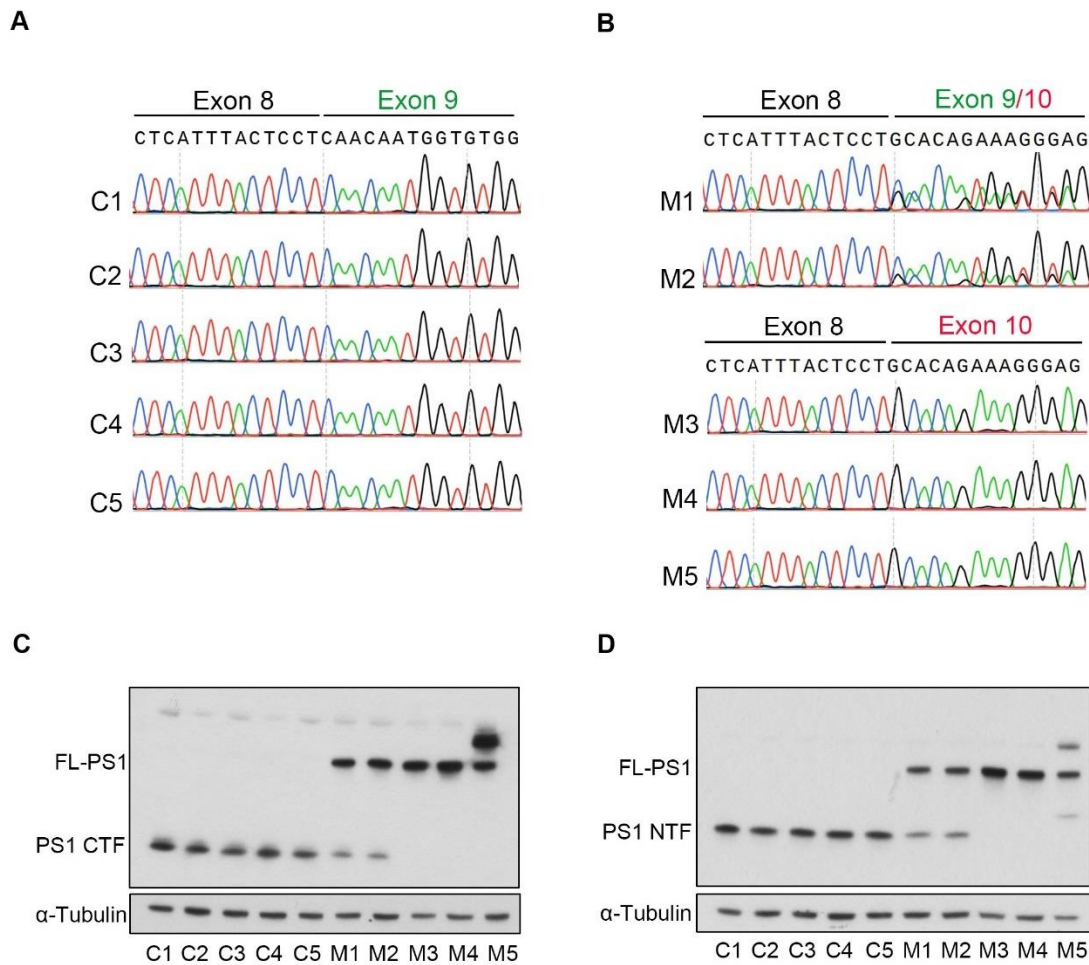

**Supplementary Figure S3. Precise exon 9 deletion in *PSEN1*- $\Delta$ E9 cynomolgus monkey-derived fibroblasts.** (A, B) Sanger sequencing results of the exon 8–10 RT-PCR products of cynomolgus monkey fibroblasts. (A) Sanger sequencing results of control fibroblasts showing a wild-type exon 8–9 junction. (B) Sanger sequencing results of *PSEN1*- $\Delta$ E9 fibroblasts showing mutated exon 8–10 junction. Double peaks at exon 8–9/10 junctions indicate heterozygous exon 9 mutation. (C) Western blot analysis of PSEN1 protein from fibroblast lysates detected by PSEN1 C-terminal antibody (Millipore, MAB5232). (D) Western blot analysis of PSEN1 protein from fibroblast lysates detected by PSEN1 N-terminal antibody (BioLegend, 823401).

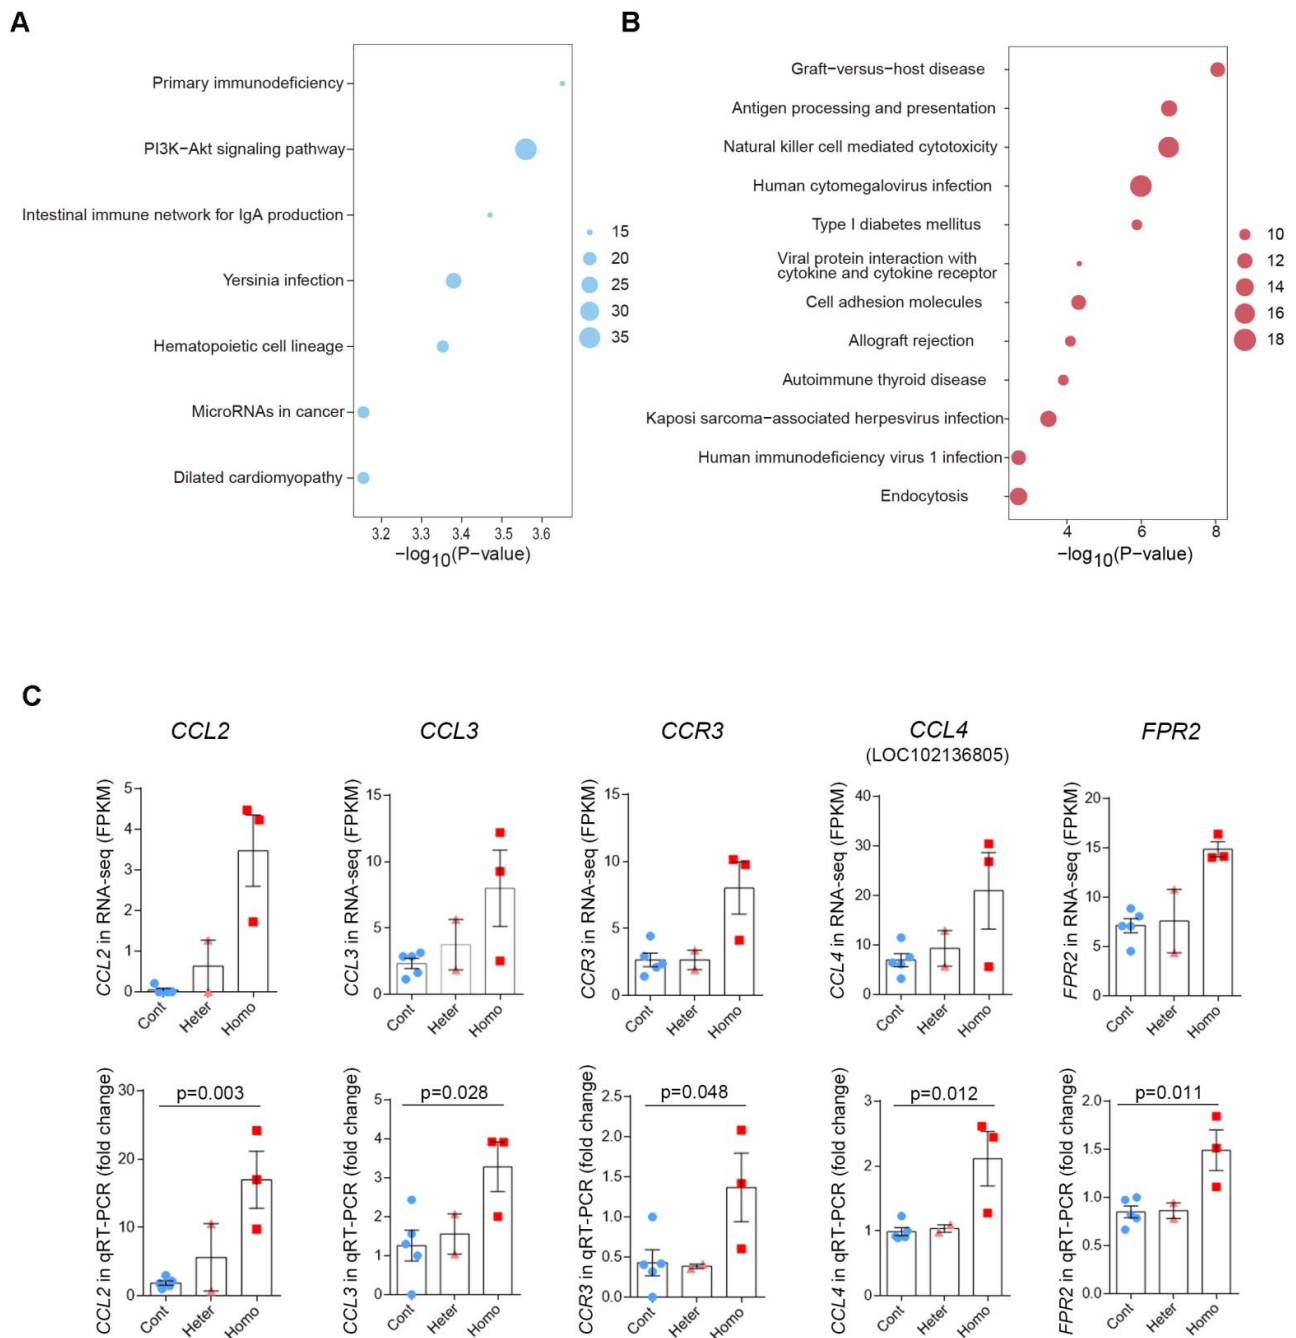

**Supplementary Figure S4. Enriched KEGG pathways from blood transcriptome sequencing of *PSENI-ΔE9* cynomolgus monkeys.** (A) and (B) exhibited the KEGG pathways downregulated (blue color) and upregulated (red color) between all five *PSENI-ΔE9* cynomolgus monkeys (M1-M5) and controls (C1-C5). In the plots, the pathways were ordered with  $-\log_{10}(P\text{-value})$  and the diameters of the circles indicated the number of DEGs enriched in the pathways. (C) Validation of key immune molecular changes of chemokine ligands and receptors in the blood transcriptome of *PSENI-ΔE9* monkeys. Upper panels: FPKM of *CCL2*, *CCL3*, *CCR3*, *CCL4*, and *FPR2* mRNA in blood RNA-seq.

Lower panels: Relative expression of *CCL2*, *CCL3*, *CCR3*, *CCL4*, and *FPR2* mRNA by qRT-PCR. Cont, control monkeys; Heter, heterozygous *PSEN1*- $\Delta$ E9 monkeys; Homo, homozygous *PSEN1*- $\Delta$ E9 monkeys. Monkey C1 was used as a reference for the relative expression of each gene in the qRT-PCR analysis. Unpaired t-test. Error bars show SEM.

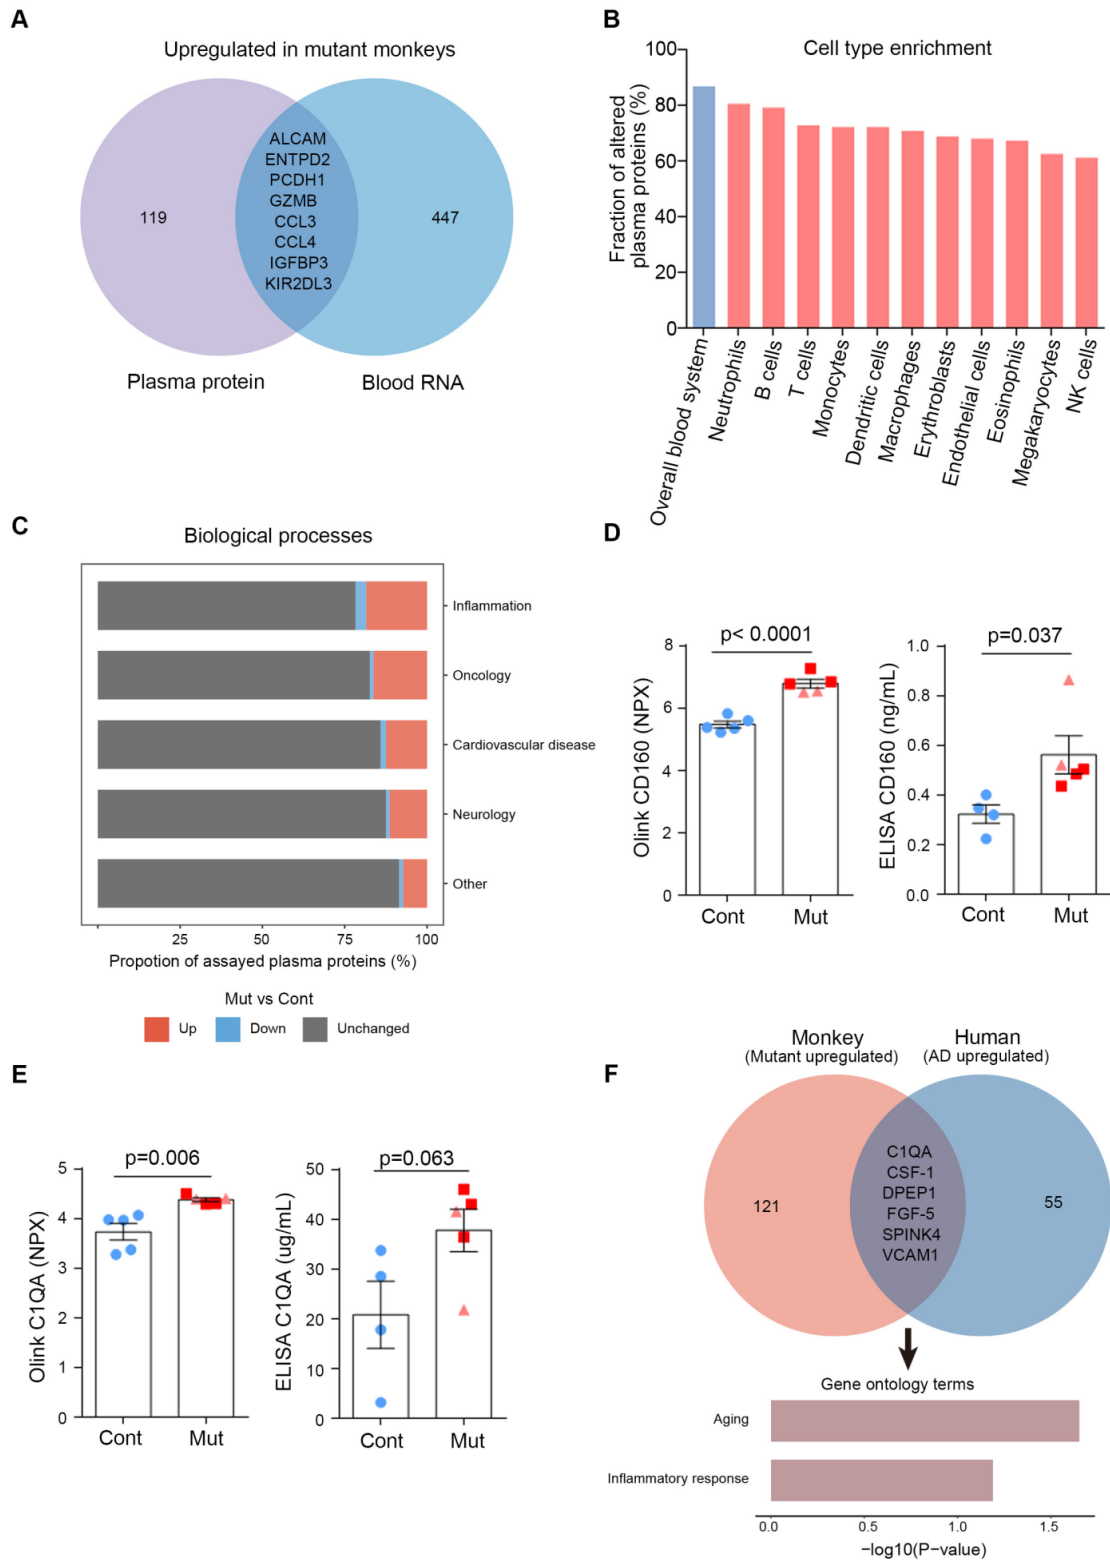

**Supplementary Figure S5. Altered plasma proteins in *PSEN1-ΔE9* cynomolgus monkeys.** (A) Overlap analysis of differentially expressed molecules in the *PSEN1-ΔE9* monkey blood transcriptome and plasma proteome. (B) Cell type enrichment analysis of the differentially expressed plasma proteins in *PSEN1-ΔE9* monkeys. (C) Proportions of the downregulated (blue) and upregulated (red) plasma proteins in each biological category. (D–E) validation of plasma CD160 (D) and C1QA (E) from 1.5-year-old cynomolgus monkeys by ELISA. Blue dots, light red triangles, and red squares indicate control monkeys, heterozygous *PSEN1-ΔE9* mutant monkeys, and homozygous *PSEN1-ΔE9* mutant monkeys, respectively. Error bars indicate SEM, unpaired t-test. (F) Overlap analysis of differentially expressed plasma proteins in *PSEN1-ΔE9* monkeys and AD patients.

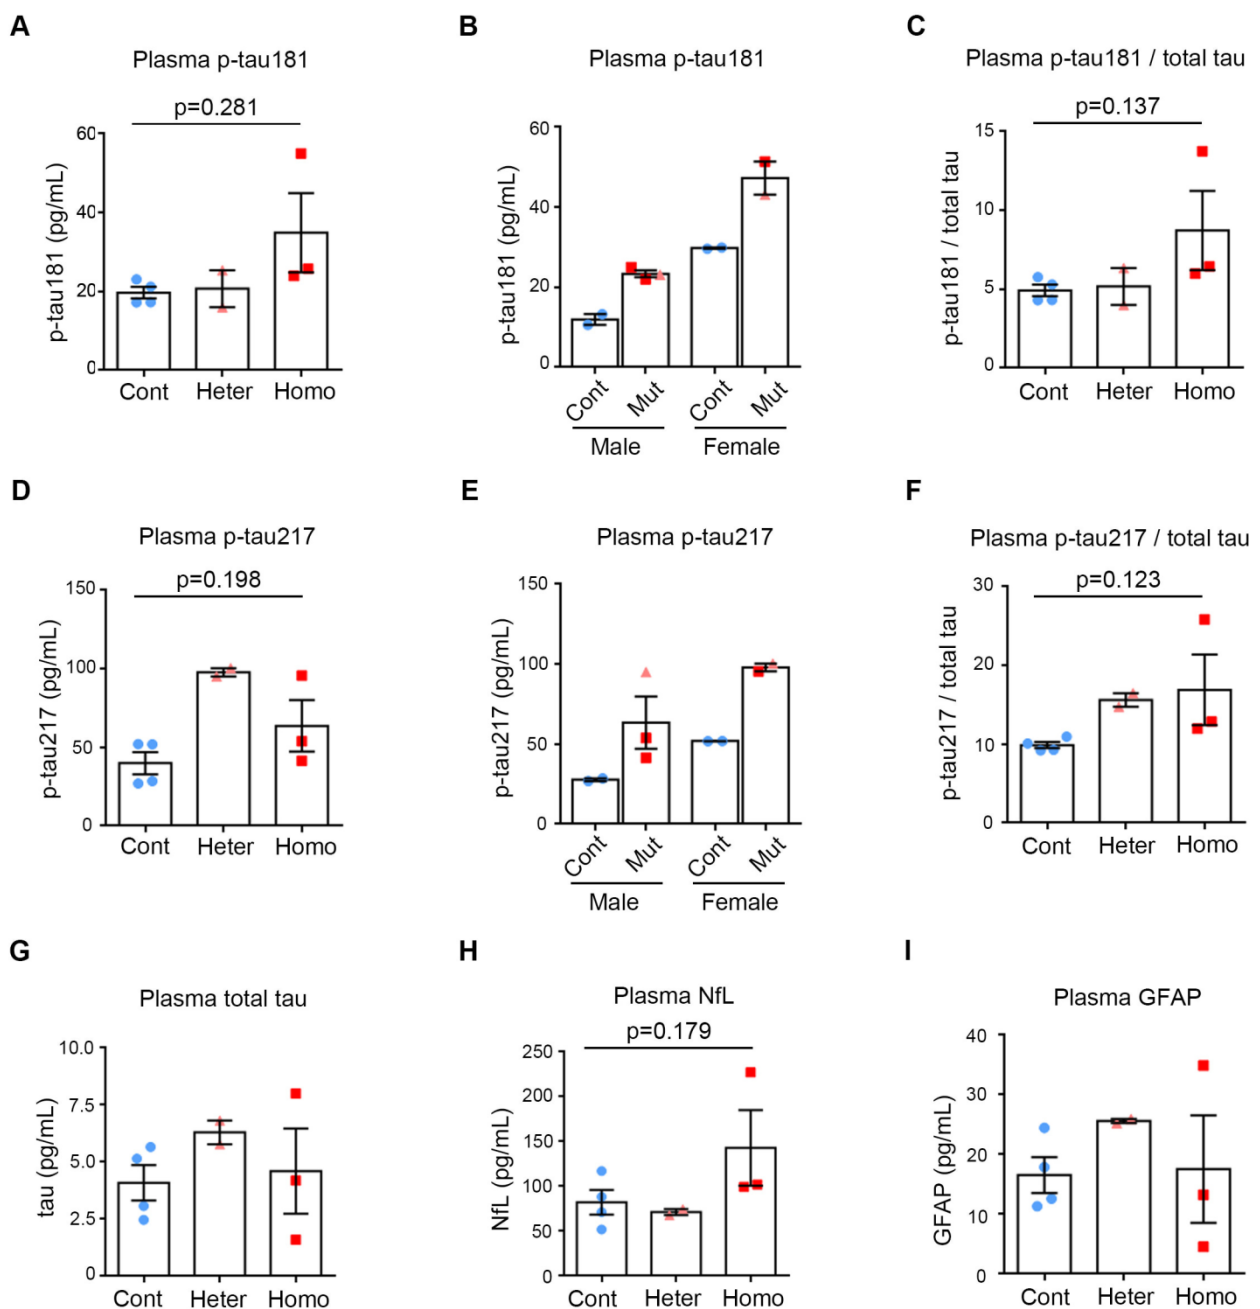

**Supplementary Figure S6. Characteristics of AD-associated pathological proteins in the plasma of *PSEN1*-ΔE9 cynomolgus monkeys.** (A–C) plasma p-tau181 level (A), plasma p-tau181 level plotted by sexes (B), and plasma p-tau181/total tau (C) from 1.5-year-old cynomolgus monkeys. (D–F) plasma p-tau217 level (D), plasma p-tau217 level plotted by sexes (E), and plasma p-tau217/total tau (F) from 1.5-year-old cynomolgus monkeys. (G–I) plasma total tau level (G), plasma NfL level (H), and plasma GFAP level (I) from 1.5-year-old cynomolgus monkeys. Cont, control monkeys; Heter, heterozygous *PSEN1*-ΔE9 monkeys; Homo, homozygous *PSEN1*-ΔE9 monkeys. Unpaired t-test. Error bars show SEM.
